# Supplementary material for: A Computational Probe into the Structure and Dynamics of the Full-Length Toll-Like Receptor 3 in a Phospholipid Bilayer
Source: MDPI journal article supplement (doi:10.3390/ijms21082857), 2020-04-19
Supplement: s1 [file s1]

<Supplementary Materials>

**A computational probe into the structure and dynamics of the full-length Toll-like receptor 3 in a phospholipid bilayer**

Mahesh Chandra Patra, Maria Batool, Muhammad Haseeb, and Sangdun Choi\*

Department of Molecular Science and Technology, Ajou University, Suwon, 16499, Korea

\*Corresponding author: [sangdunchoi@ajou.ac.kr](mailto:sangdunchoi@ajou.ac.kr)

**The supplementary materials include the following items:**

**Figure S1. Structural comparison between average (minimized) coordinates from the three replicates of S1-, S2-, and S3-TLR3 simulation sets.** (a and d) S1-TLR3. (b and e) S2-TLR3. (c and f) S3-TLR3. (g) Comparison of root mean square deviation between the average-coordinates from the molecular dynamics trajectories.

**Figure S2. Analysis of different properties of dsRNA base pair and backbone.** (A-F) Base pair parameters of dsRNA in three representative MD simulation trajectories. (G-I) Comparative RMSD curves of dsRNA in all three replicates of the MD simulations.

**Figure S3. RMSD parameters of the individual domains (ECD, TM, and TIR) of TLR3 in all three replicates of the MD simulation.**

**Figure S4. Averaged stability parameters of the phospholipid bilayer during molecular dynamics simulations.** (A-C) The density profile of different membrane components. (D-F) The order parameters of the acyl chains of phospholipids. (G-I) The lateral diffusion of lipids in terms of the mean square displacement of phosphate (P8) atoms. Data shown represent the replicate 2 of the MD simulation.

**Figure S5. MD simulation of an NMR structure of isolated TM domain of TLR3.** (A) Helical length. (B) Axial tilt. (C) Distance between axes centers. (D) Helix crossing angle. (E) Membrane solvated model of TM domains at 0-ns. (F) Membrane solvated model of TM domains at 200-ns for comparison. (G) Packing interaction of a representative TM bundle (189.1 ns) extracted from the low-energy ensemble of the Gibbs free energy landscape.

**Figure S6. Sequence alignment between the TLR3-TIR domain and the homologous templates.** (A) Alignment between the TLR2- and TLR3-TIR domains. (B) Alignment between the TLR6- and TLR3-TIR domains. (C) Alignment between the TLR10- and TLR3-TIR domains. The residues involved in the packing interaction of the dimer are colored red. Residues forming disulfide bonds are colored green. The names of the structural elements comprising the dimer interface are presented at the top of each alignment. Identical residues are indicated with an asterisk (\*), residues with strong similarity are indicated with a colon (:), and residues with weakly similar properties are indicated with periods (.). The corresponding key residues in TLR3 are shown in a

box to the right of each alignment. The alignments were generated using Clustal-Omega with default parameters.

**Table S1.** The top-scoring templates used for the homology modeling of TLR3-TIR domains.

**Table S2.** Stereochemical parameters of TLR3 models.

**Table S3.** The molecular composition of the simulation systems in the present study.

**Table S4.** Calculated area per lipid (APL) and thickness of the membrane bilayer in the three molecular dynamics simulation systems.

**Table S5.** Intermolecular hydrogen bonds (H-bonds) formed between dsRNA and S1-TLR3.

**Table S6.** Intermolecular hydrogen bonds (H-bonds) formed between dsRNA and S2-TLR3.

**Table S7.** Intermolecular hydrogen bonds (H-bonds) formed between dsRNA and S3-TLR3.

**Table S8.** Average base-pair parameters of dsRNA molecule in the three molecular dynamics trajectories.

**Table S9.** Average distance between dimer forming residues of the extracellular domains of TLR3.

**Table S10.** Selected helical properties of the TM helices in the three TLR3 models.

**Table S11.** Comparison of intermolecular hydrogen bonds (H-bonds) formed at the dimerization interface of TIR domains.

**Table S12.** Intermolecular salt bridges between TIR domain subunits.

**Table S13.** Buried surface area (BSA) of key residues at the dimer interface of TIR domains.

**Model S1.** A representative, low-energy membrane-solvated model of dsRNA-bound full-length TLR3 extracted from 173.6-ns MD simulation.

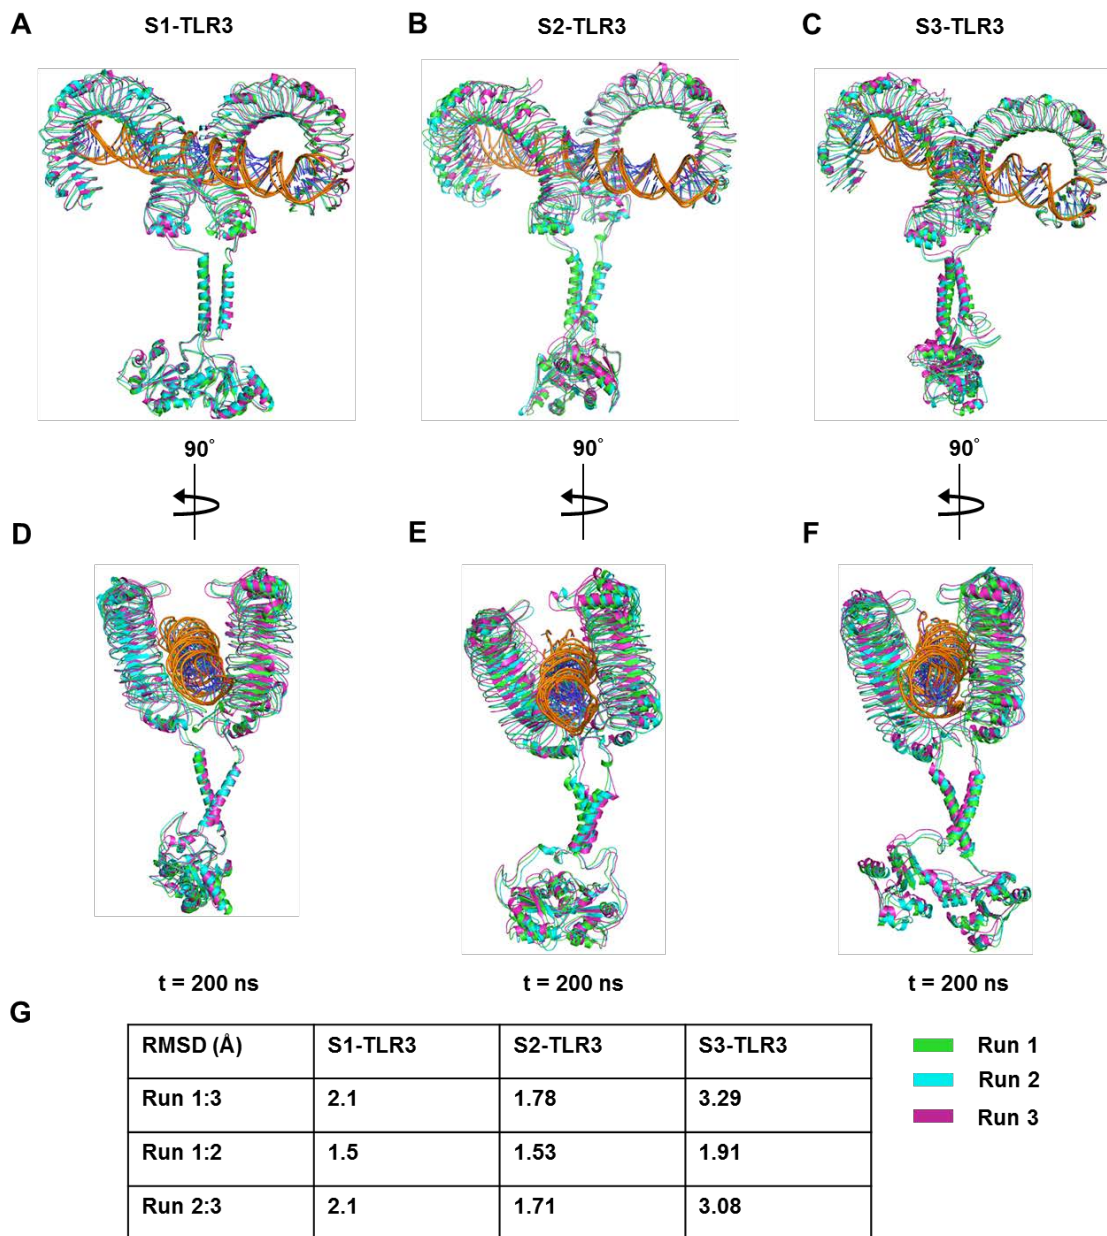

**Figure S1. Structural comparison between average (minimized) coordinates from the three replicates of S1-, S2-, and S3-TLR3 simulation sets. (A and D) S1-TLR3. (B and C) S2-TLR3. (E and F) S3-TLR3. (G) Comparison of root mean square deviation between the average-coordinates from the molecular dynamics trajectories.**

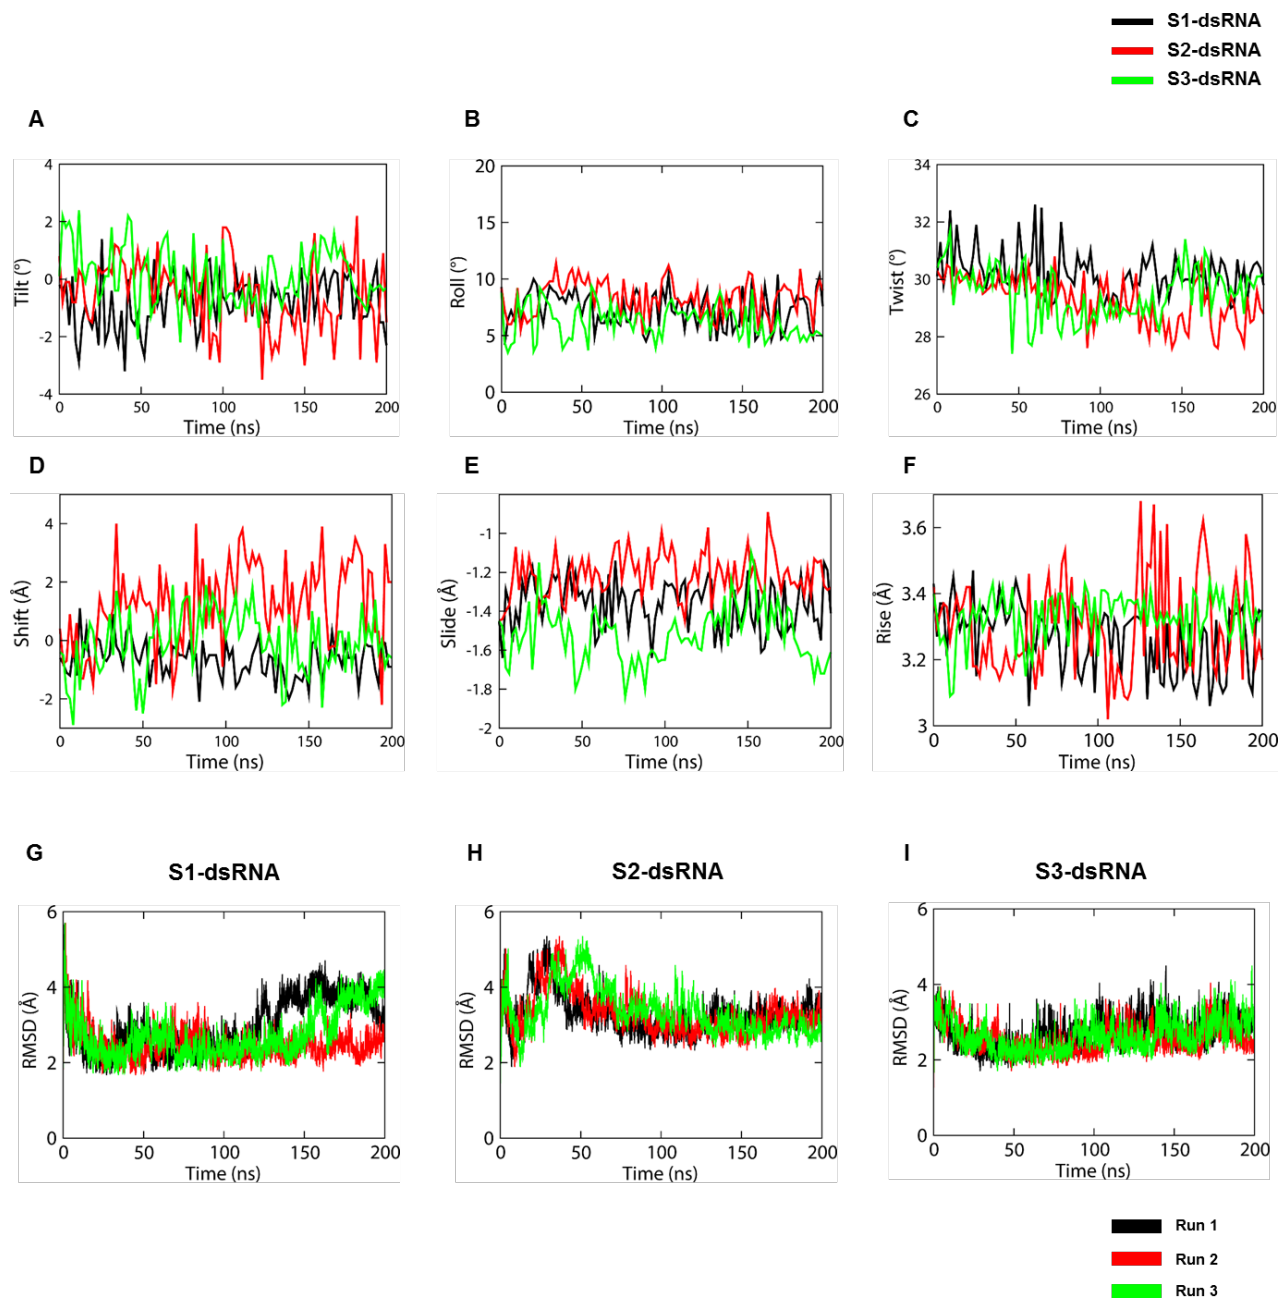

**Figure S2. Analysis of different properties of dsRNA base pair and backbone.** (A-F) Base pair parameters of dsRNA in three representative MD simulation trajectories. (G-I) Comparative RMSD curves of dsRNA in all three replicates of the MD simulations.

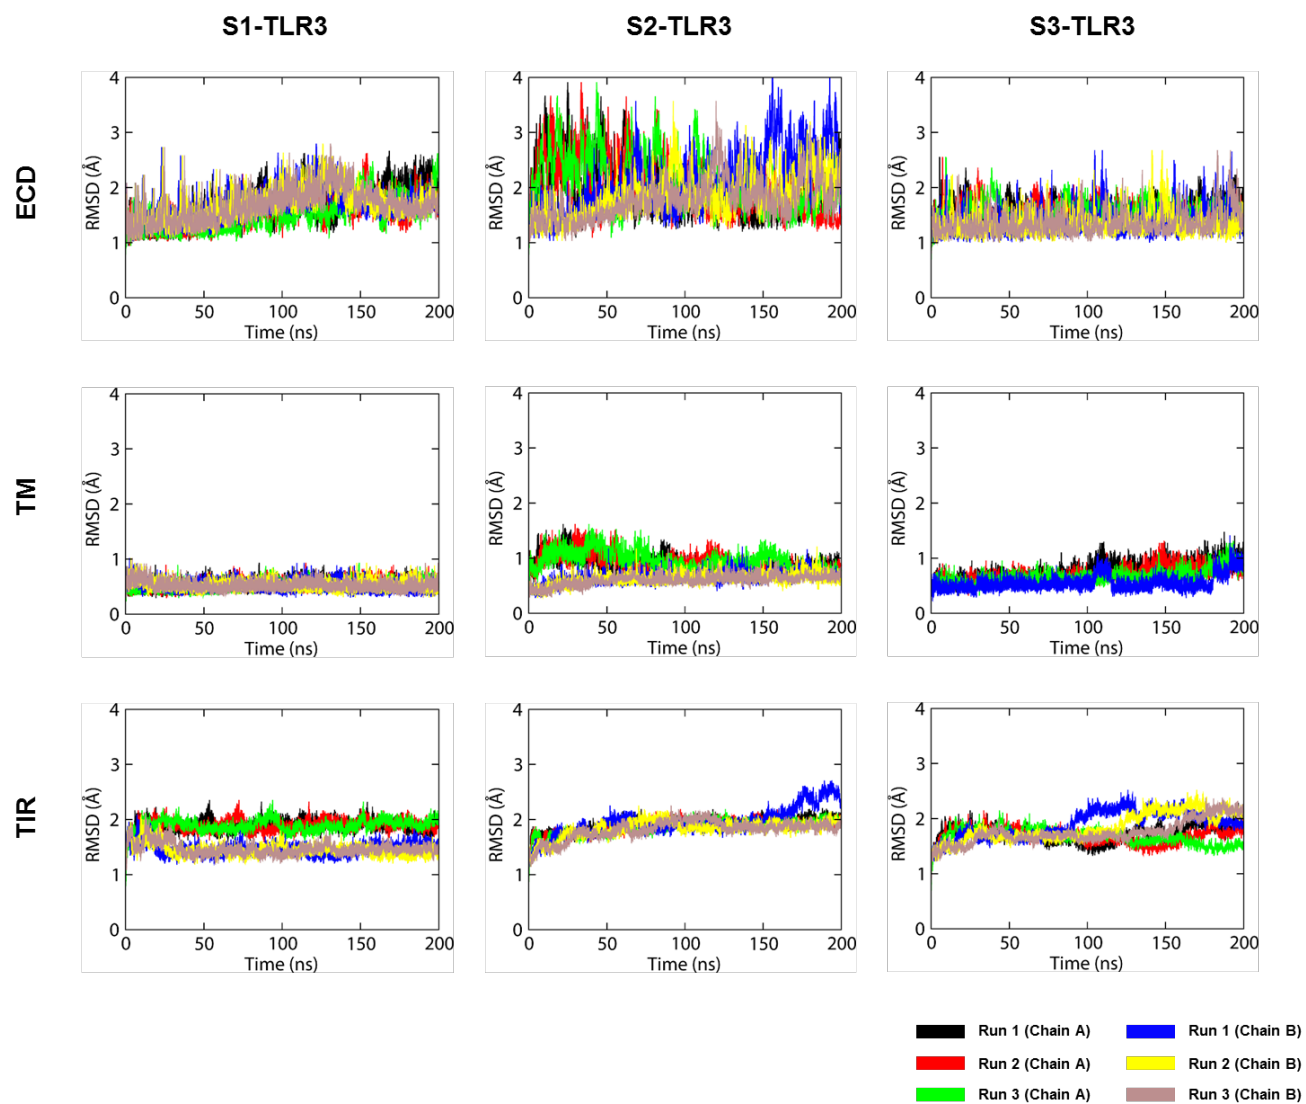

**Figure S3.** RMSD parameters of the individual domains (ECD, TM, and TIR) of TLR3 in all three replicates of the MD simulation.

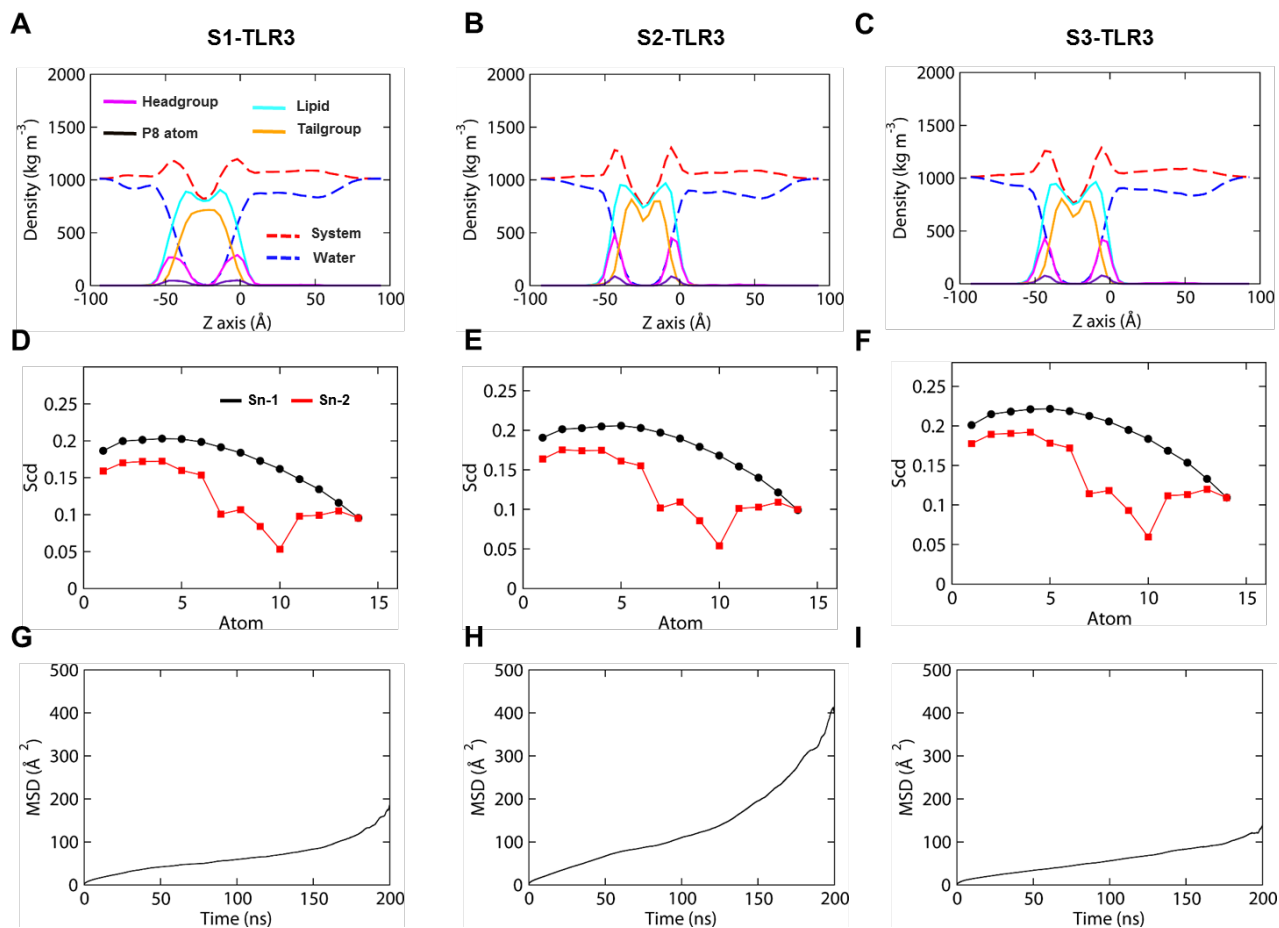

**Figure S4. Averaged stability parameters of the phospholipid bilayer during molecular dynamics simulations.** (A-C) The density profile of different membrane components. (D-F) The order parameters of the acyl chains of phospholipids. (G-I) The lateral diffusion of lipids in terms of the mean square displacement of phosphate (P8) atoms. Data shown represent the replicate 2 of the MD simulation.

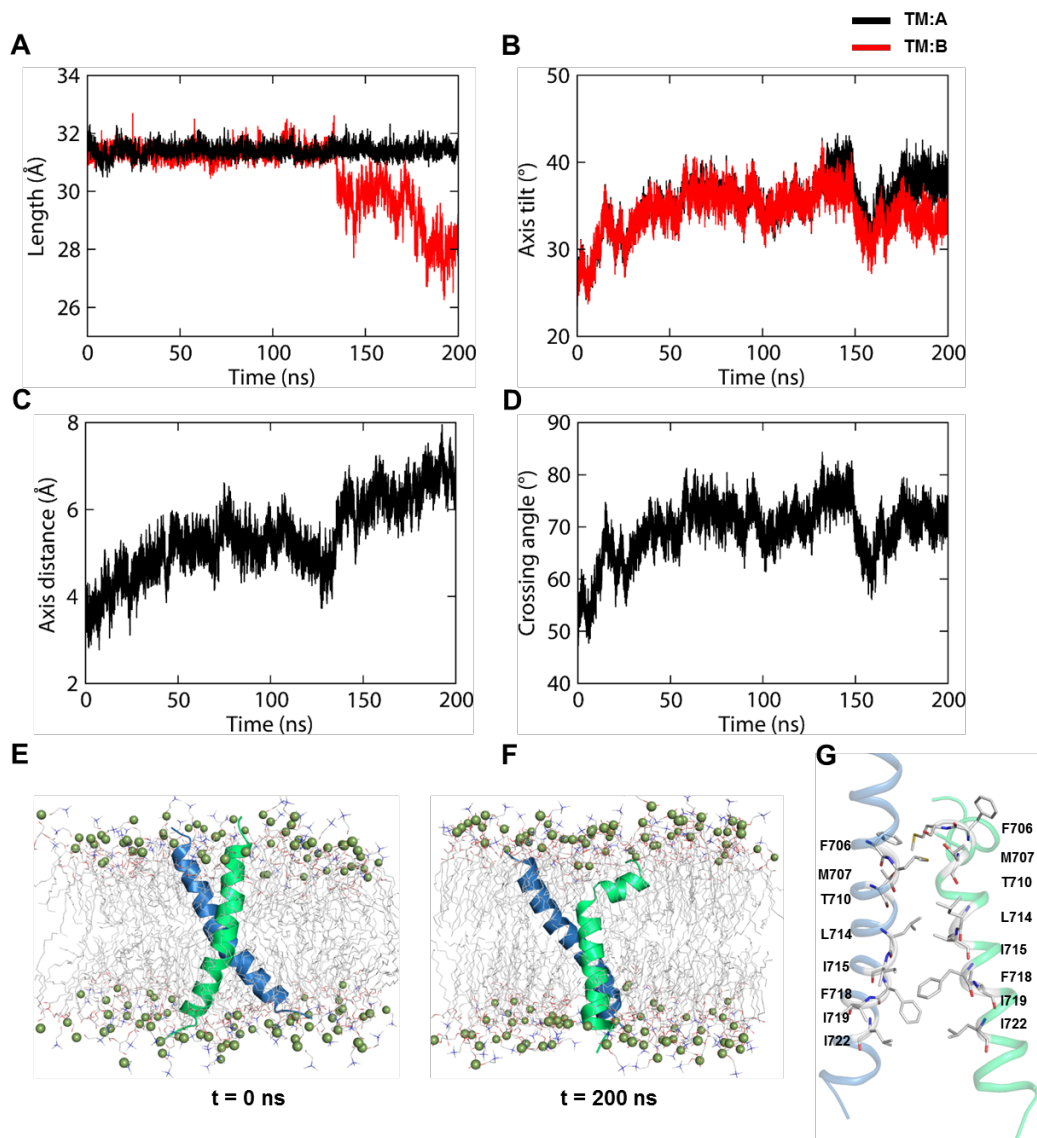

**Figure S5. MD simulation of an NMR structure of isolated TM domain of TLR3.** (A) Helical length. (B) Axial tilt. (C) Distance between axes centers. (D) Helix crossing angle. (E) Membrane solvated model of TM domains at 0-ns. (F) Membrane solvated model of TM domains at 200-ns for comparison. (G) Packing interaction of a representative TM bundle (189.1 ns) extracted from the low-energy ensemble of the Gibbs free energy landscape.



| A             |  |                                                                         |     |               |  |
|---------------|--|-------------------------------------------------------------------------|-----|---------------|--|
|               |  | βA                                                                      | βB  | BB            |  |
| TLR2 639-784  |  | IQYDAFVSYSERDAYWVENLMVQELFNFPFKLCLHKRDFIPGKWIIDNIIDSIEKSHK              | 60  | TLR2 -> TLR3  |  |
| TLR3 754-896  |  | FEYAAYIIHAYKDKDWVWEH-FSSMEKEDQSLKFCLEERDFEAGVFELEAIVNSIKRSRK            | 59  | C640 -> E755  |  |
|               |  | : * * : : : * ** : . . . : * : : * : * : * * * * : : : * : * : * : *    |     | Y641 -> Y656  |  |
|               |  | αC αC` DD                                                               |     | R748 -> A863  |  |
| TLR2 639-784  |  | TVFVLSNFVKSEWCKY-ELDFSHFRLFDENNDAAAILLEPIEKKAIPQRFCKLRKIMN              | 119 | C750 -> C865  |  |
| TLR3 754-896  |  | IIFVITHHLLKDP LCKRFKVHHAVQQAIEQNLD SIILVFLEEIPDYKLNHALCLLRGMFK          | 119 | C673 -> C787  |  |
|               |  | : * : : : : * * : . . . : : : * : * : * : * * : . : : : * * : : :       |     | D678 -> D792  |  |
|               |  |                                                                         |     | F679 -> F793  |  |
| TLR2 639-784  |  | TKTYLEWPMDEAQREGFWVNLRAA IKS 146                                        |     | P681 -> A795  |  |
| TLR3 754-896  |  | SHCILNWPVQKERIGAFRHKLQVA--- 143                                         |     | C713 -> C827  |  |
|               |  | : : * : * : : : : . * : * : *                                           |     | L717 -> V832  |  |
| B             |  |                                                                         |     |               |  |
|               |  |                                                                         |     | BB            |  |
| TLR6 640-784  |  | LQFHAFISYSEHSDSAWKSELVPY-LEKEDIQICLHERNFVPGKSIVENIINCIEKSYKS            | 59  | TLR6 -> TLR3  |  |
| TLR3 754-896  |  | FEYAAYIIHAYKDKDWVWEHFSMSMEKEDQSLKFCLEERDFEAGVFELEAIVNSIKRSRK            | 60  | I684 -> E789  |  |
|               |  | : : : * * : : : * * . . . : * : : : * : * : * * * * : * : * : * : * : * |     | Q708 -> K823  |  |
|               |  | αC αC` DD                                                               |     | C712 -> C827  |  |
| TLR6 640-784  |  | IFVLSPNFVQSEWCHY-ELYFAHNNLFHEGSSNNLILILLEPIPQNSIPNKYHKLKALMTQ           | 118 | H713 -> K828  |  |
| TLR3 754-896  |  | IFVITHHLLKDP LCKRFKVHHAVQQAIEQNLD SIILVFLEEIPDYKLNHALCLLRGMFKS          | 120 | L716 -> V832  |  |
|               |  | *** : : : : . * : : : * : : : . . : * : * : * * : * : : : : : . : . . . |     | Y717 -> H833  |  |
|               |  |                                                                         |     | N746 -> A863  |  |
| TLR6 640-784  |  | RTYLQWPKEKSKRGLFWANIRAAFNMK 145                                         |     | K747 -> H862  |  |
| TLR3 754-896  |  | HCILNWPVQKERIGAFRHKLQVA---- 143                                         |     |               |  |
|               |  | : * : * * : * : * * : * : *                                             |     |               |  |
| C             |  |                                                                         |     |               |  |
|               |  |                                                                         |     | BB            |  |
| TLR10 632-778 |  | VRFHAFISYSEHSDSLVWKNELIPNLEKEDGSILICLYESYFDPGKSI SENIVSFIEKSYK          | 60  | TLR10 -> TLR3 |  |
| TLR3 754-896  |  | FEYAAYIIHAYKDKDWVWEH-FSSMEKEDQSLKFCLEERDFEAGVFELEAIVNSIKRSRK            | 59  | Y678 -> E789  |  |
|               |  | . . . * : * : : * * * : : : * * * * : * * * * * * * * * * * : * : * *   |     | F672 -> F793  |  |
|               |  | αC DD                                                                   |     | P674 -> A795  |  |
| TLR10 632-778 |  | SIFVLSPNFVQNEWCHY-EFYFAHNNLFHENSNDHIILILLEPIPFYCIPTRYHKLKALLE           | 119 | K676 -> V797  |  |
| TLR3 754-896  |  | IIFVITHHLLKDP LCKRFKVHHAVQQAIEQNLD SIILVFLEEIPDYKLNHALCLLRGMFK          | 119 | I678 -> E799  |  |
|               |  | *** : : : : . * : : : * : : : * * * * : * * * * : * : : : : : : : : :   |     | S679 -> L800  |  |
|               |  |                                                                         |     | C706 -> C827  |  |
| TLR10 632-778 |  | KKAYLEWPKDRRCGLFWANLRAAINVN 147                                         |     | H707 -> K828  |  |
| TLR3 754-896  |  | SHCILNWPVQKERIGAFRHKLQVA---- 143                                        |     | E709 -> K831  |  |
|               |  | . . . * : * : : : * * : * : *                                           |     | F710 -> V832  |  |
|               |  |                                                                         |     | R741 -> A866  |  |

**Figure S6. Sequence alignment between the TLR3-TIR domain and the homologous templates.** (A) Alignment between the TLR2- and TLR3-TIR domains. (B) Alignment between the TLR6- and TLR3-TIR domains. (C) Alignment between the TLR10- and TLR3-TIR domains. The residues involved in the packing interaction of the dimer are colored red. Residues forming disulfide bonds are colored green. The names of the structural elements comprising the dimer interface are presented at the top of each alignment. Identical residues are indicated with an asterisk (\*), residues with strong similarity are indicated with a colon (:), and residues with weakly similar properties are indicated with periods (.). The corresponding key residues in TLR3 are shown in a box to the right of each alignment. The alignments were generated using Clustal-Omega with default parameters.

**Table S1. The top-scoring templates used for the homology modeling of TLR3-TIR domains.**

| <b>PDB code</b> | <b>Sequence identity</b> | <b>e-value</b> | <b>Query coverage</b> |
|-----------------|--------------------------|----------------|-----------------------|
| 2J67            | 27.78%                   | 8e-29          | 99%                   |
| 4OM7            | 26.39%                   | 2e-34          | 100%                  |
| 1O77            | 25.00%                   | 2e-29          | 99%                   |

*TLR3-TIR, Toll-like receptor-Toll/interleukin-1 receptor*

**Table S2. Stereochemical parameters of TLR3 models.**

|                            | PROCHECK ( <sup>1</sup> Ramachandran plot) |                |                | <sup>2</sup> ProSA | <sup>3</sup> Verify 3D | <sup>4</sup> ERRAT |
|----------------------------|--------------------------------------------|----------------|----------------|--------------------|------------------------|--------------------|
|                            | Favored region                             | Allowed region | Outlier region |                    |                        |                    |
| <b><sup>5</sup>S1-TLR3</b> |                                            |                |                |                    |                        |                    |
| Subunit A                  | 776 (89.5%)                                | 81 (9.3%)      | 10 (1.2%)      | -7.55              | 89.43%                 | 84.52              |
| Subunit B                  | 784 (90.4%)                                | 77 (8.9%)      | 6 (0.7%)       | -7.49              | 90.80%                 | 87.60              |
| <b><sup>6</sup>S2-TLR3</b> |                                            |                |                |                    |                        |                    |
| Subunit A                  | 775 (89.4%)                                | 85 (9.8%)      | 7 (0.8%)       | -7.59              | 92.41%                 | 78.63              |
| Subunit B                  | 782 (90.2%)                                | 76 (8.8%)      | 9 (1.0%)       | -7.2               | 92.41%                 | 77.72              |
| <b><sup>7</sup>S3-TLR3</b> |                                            |                |                |                    |                        |                    |
| Subunit A                  | 761 (87.9%)                                | 99 (11.4%)     | 6 (0.7%)       | -7.3               | 87.23%                 | 83.89              |
| Subunit B                  | 790 (91.2%)                                | 69 (8.0%)      | 7 (0.8%)       | -7.1               | 86.88%                 | 85.18              |

<sup>1</sup>Ramachandra plot displays dihedral angles ( $\phi/\psi$ ) for the non-glycine and -proline residues of a given protein.

<sup>2</sup>ProSA calculates the overall quality score (Z-score) of a given protein structure and indicates its similarity to native proteins in the plot.

<sup>3</sup>Verify 3D predicts the compatibility of a given tertiary structure (3D) based on its own amino acid sequence (1D). Usually, a good quality structure possesses a 3D-1D score of >80%.

<sup>4</sup>ERRAT calculates the overall quality factor of a given structure based on nonbonded atomic interactions. A good quality model typically obtains a quality factor of >50.

**Table S3. The molecular composition of the simulation systems in the present study.**

| System | Bilayer | Lipid | Water  | Na <sup>+</sup> | Cl <sup>-</sup> | Ligand | Protein | Duration          |
|--------|---------|-------|--------|-----------------|-----------------|--------|---------|-------------------|
| S1     | POPC    | 679   | 98,542 | 106             | N/A             | dsRNA  | TLR3    | 200 ns $\times$ 3 |
| S2     | POPC    | 677   | 98,445 | 106             | N/A             | dsRNA  | TLR3    | 200 ns $\times$ 3 |
| S3     | POPC    | 677   | 98,278 | 106             | N/A             | dsRNA  | TLR3    | 200 ns $\times$ 3 |
| S4     | POPC    | 103   | 4,462  | 4               | N/A             | N/A    | TLR3-TM | 200 ns $\times$ 1 |

POPC, *1-palmitoyl-2-oleoyl-sn-glycero-3-phosphocholine* bilayer; dsRNA, *double-stranded RNA*; TLR3, *Toll-like receptor 3*; TLR3-TM, *NMR structure of TLR3 transmembrane domain*

**Table S4. Calculated area per lipid (APL) and thickness of the membrane bilayer in the three molecular dynamics simulation systems.**

| System  | lateral area                       | Average APL [top leaflet]      |                                | Average APL [bottom leaflet]   |                                | Thickness                   |
|---------|------------------------------------|--------------------------------|--------------------------------|--------------------------------|--------------------------------|-----------------------------|
|         |                                    | Without protein                | With protein                   | Without protein                | With protein                   |                             |
| S1-TLR3 | $20840.67 \pm 12.42 \text{ \AA}^2$ | $62.58 \pm 2.23 \text{ \AA}^2$ | $56.84 \pm 3.15 \text{ \AA}^2$ | $60.23 \pm 1.96 \text{ \AA}^2$ | $53.45 \pm 1.21 \text{ \AA}^2$ | $36.0 \pm 2.11 \text{ \AA}$ |
| S2-TLR3 | $21087.41 \pm 22.34 \text{ \AA}^2$ | $59.40 \pm 2.44 \text{ \AA}^2$ | $55.19 \pm 4.24 \text{ \AA}^2$ | $65.48 \pm 2.57 \text{ \AA}^2$ | $56.48 \pm 2.32 \text{ \AA}^2$ | $37.8 \pm 2.45 \text{ \AA}$ |
| S3-TLR3 | $21011.59 \pm 12.17 \text{ \AA}^2$ | $61.98 \pm 2.27 \text{ \AA}^2$ | $58.36 \pm 2.96 \text{ \AA}^2$ | $62.16 \pm 2.81 \text{ \AA}^2$ | $53.09 \pm 3.01 \text{ \AA}^2$ | $37.9 \pm 2.67 \text{ \AA}$ |

*Values are averaged over all structural frames in the molecular dynamics trajectories. S1, S2, and S3 represent set 1, 2, and 3, respectively.*

**Table S5. Intermolecular hydrogen bonds (H-bonds) formed between dsRNA and S1-TLR3.**

| TLR3    |         |         |      | Occupancy (%) |       |       | dsRNA |         |         |
|---------|---------|---------|------|---------------|-------|-------|-------|---------|---------|
|         | Subunit | Residue | Atom | Run 1         | Run 2 | Run 3 | Atom  | Residue | Subunit |
| Site I  | A       | N515    | HD21 | 49.35         | 44.33 | 43.23 | O2P   | C24     | D       |
|         | A       | N517    | HD22 | 46.86         | 43.85 | 45.83 | O2    | U22     | D       |
|         | A       | H539    | O    | 34.88         | 35.87 | 37.48 | HO'2  | U22     | D       |
|         | A       | N541    | HD22 | 40.54         | 43.58 | 44.55 | O2    | U21     | D       |
|         | A       | N541    | HD21 | 72.23         | 74.26 | 76.62 | O2    | U22     | D       |
|         | A       | R544    | HH21 | 40.22         | 46.25 | 47.25 | O2'   | C28     | C       |
|         | A       | R544    | HH11 | 53.15         | 58.14 | 58.41 | O2    | C20     | D       |
|         | B       | N515    | HD22 | 38.28         | 33.23 | 33.22 | O2P   | G23     | C       |
|         | B       | N515    | HD21 | 39.96         | 35.92 | 35.19 | O3'   | A22     | C       |
|         | B       | N517    | HD21 | 52.24         | 54.24 | 56.22 | N3    | A21     | C       |
|         | B       | N517    | HD22 | 54.6          | 53.54 | 54.1  | O2    | U27     | D       |
|         | B       | N541    | OD1  | 19.34         | 16.34 | 16.53 | HO'2  | A20     | C       |
|         | B       | R544    | HH11 | 61.63         | 67.56 | 67.66 | O2'   | C19     | C       |
|         | B       | R544    | HH21 | 53.47         | 54.47 | 55.44 | O2'   | C29     | D       |
| Site II | A       | R64     | HE   | 57.63         | 53.63 | 54.64 | O3'   | G43     | D       |
|         | A       | R64     | HH21 | 56.86         | 54.48 | 55.38 | O3'   | G43     | D       |
|         | A       | R64     | HH21 | 40.22         | 46.52 | 46.42 | O1P   | A44     | D       |
|         | A       | T86     | HG1  | 50.16         | 54.16 | 57.15 | O2    | U5      | C       |
|         | A       | E110    | OE2  | 55.13         | 56.41 | 54.12 | HO'2  | A44     | D       |
|         | A       | E110    | OE1  | 64.42         | 67.34 | 63.64 | HO'2  | A45     | D       |

*S1-TLR3, Simulation 1 Toll-like receptor 3; dsRNA, double-stranded RNA. Values presented are averaged over all structural frames in the molecular dynamics trajectories of each set. H-bond occupancy was defined as the fraction of simulation time where an H-bond was formed with cutoff radius of 3.5 Å distance and angle of 30°.*

**Table S6. Intermolecular hydrogen bonds (H-bonds) formed between dsRNA and S2-TLR3.**

| TLR3   |         |         | Occupancy (%) |       |       | dsRNA |       |         |         |
|--------|---------|---------|---------------|-------|-------|-------|-------|---------|---------|
|        | Subunit | Residue | Atom          | Run 1 | Run 2 | Run 3 | Atom  | Residue | Subunit |
| Site I | A       | N515    | HD21          | 33.67 | 32.46 | 34.63 | O2P   | C24     | D       |
|        | A       | N517    | HD21          | 25.75 | 29.75 | 25.72 | O4'   | C23     | D       |
|        | A       | N517    | HD22          | 16.52 | 19.54 | 14.52 | O2    | U22     | D       |
|        | A       | N541    | HD22          | 17.83 | 19.84 | 13.83 | O2    | U21     | D       |
|        | A       | R544    | HH11          | 48.54 | 45.55 | 45.54 | O2    | C20     | D       |
|        | A       | R544    | HH21          | 33.34 | 32.34 | 37.36 | O2'   | C28     | C       |
|        | B       | N515    | HD21          | 42.65 | 42.63 | 62.63 | O2P   | G23     | C       |
|        | B       | N517    | HD22          | 23.69 | 20.62 | 30.64 | O2    | U27     | D       |
|        | B       | N541    | OD1           | 44.18 | 47.16 | 57.17 | HO'2  | A20     | C       |
|        | B       | N541    | HD22          | 35.36 | 34.38 | 64.36 | N3    | A20     | C       |
|        | B       | R544    | HH11          | 44.97 | 43.94 | 43.95 | O2'   | C19     | C       |
|        | B       | R544    | HH11          | 53.96 | 57.92 | 53.95 | O2    | C19     | C       |
|        | B       | R544    | HH21          | 36.54 | 38.56 | 34.53 | O2'   | C29     | C       |
|        | Site II | A       | R64           | HH21  | 47.45 | 43.44 | 43.46 | O1P     | A44     |
| A      |         | R64     | HH21          | 58.75 | 50.37 | 55.75 | O3'   | G43     | D       |
| A      |         | F84     | O             | 26.94 | 25.95 | 26.93 | HO'2  | U5      | C       |
| A      |         | E110    | OE1           | 65.53 | 60.57 | 63.54 | HO'2  | A45     | D       |
| B      |         | R64     | HH22          | 43.23 | 47.38 | 42.36 | O1P   | C43     | C       |
| B      |         | T86     | HG1           | 54.52 | 52.56 | 53.53 | O2'   | C6      | D       |
| B      |         | E110    | OE1           | 46.21 | 48.24 | 45.42 | HO'2  | A44     | C       |

*S2-TLR3, Simulation 2-Toll-like receptor 3; dsRNA, double-stranded RNA. Values presented are averaged over all structural frames in the molecular dynamics trajectories of each set. H-bond occupancy was defined as the fraction of simulation time where an H-bond was formed with cutoff radius of 3.5 Å distance and angle of 30°.*

**Table S7. Intermolecular hydrogen bonds (H-bonds) formed between dsRNA and S3-TLR3.**

| TLR3    |         |         | Occupancy (%) |       |       | dsRNA |      |         |         |
|---------|---------|---------|---------------|-------|-------|-------|------|---------|---------|
|         | Subunit | Residue | Atom          | Run 1 | Run 2 | Run 3 | Atom | Residue | Subunit |
| Site I  | A       | N515    | HD21          | 65.13 | 66.24 | 67.65 | O2P  | C24     | D       |
|         | A       | N517    | HD22          | 46.24 | 75.25 | 45.24 | O2   | U22     | D       |
|         | A       | N541    | OD1           | 17.25 | 56.25 | 68.23 | HO'2 | U21     | D       |
|         | A       | N541    | HD22          | 16.98 | 65.94 | 69.93 | O2   | U21     | D       |
|         | A       | R544    | HH21          | 45.69 | 44.6  | 49.64 | O2'  | C28     | C       |
|         | A       | R544    | HH11          | 34.46 | 33.44 | 58.45 | O2   | C20     | D       |
|         | B       | N515    | HD22          | 64.13 | 76.16 | 64.17 | O2P  | G23     | C       |
|         | B       | N515    | HD21          | 56.36 | 57.66 | 56.66 | O3'  | A22     | C       |
|         | B       | N517    | HD22          | 60.34 | 65.65 | 60.94 | O2   | U27     | D       |
|         | B       | N541    | OD1           | 47.23 | 66.24 | 50.23 | HO'2 | A20     | C       |
|         | B       | N541    | HD22          | 55.23 | 55.25 | 55.25 | N3   | A20     | C       |
|         | B       | R544    | HH21          | 24.14 | 74.13 | 63.14 | O2'  | C29     | D       |
|         | B       | R544    | HH11          | 33.15 | 76.14 | 54.13 | O2   | C19     | C       |
| Site II | A       | R64     | HH21          | 64.53 | 65.54 | 55.55 | O1P  | A44     | D       |
|         | A       | R64     | HH21          | 55.24 | 51.26 | 51.27 | O3'  | G43     | D       |
|         | A       | T86     | H             | 46.26 | 47.27 | 63.26 | O2'  | U5      | C       |
|         | A       | E110    | OE2           | 57.18 | 55.15 | 55.15 | HO'2 | A44     | D       |
|         | A       | E110    | OE1           | 58.71 | 59.13 | 61.14 | 2HO' | A45     | D       |
|         | B       | R64     | HH12          | 60.04 | 58.03 | 58.05 | O1P  | C43     | C       |
|         | B       | R64     | HH22          | 55.95 | 64.94 | 44.94 | O1P  | C43     | C       |
|         | B       | T86     | HG1           | 56.58 | 78.58 | 68.18 | O2'  | C6      | D       |

*S3-TLR3, Simulation 3-Toll-like receptor 3; dsRNA, double-stranded RNA. Values presented are averaged over all structural frames in the molecular dynamics trajectories of each set. H-bond occupancy was defined as the fraction of simulation time where an H-bond was formed with cutoff radius of 3.5 Å distance and angle of 30°.*



**Table S8. Average base-pair parameters of dsRNA molecule in the three molecular dynamics trajectories.**

|                    | <b>Tilt (°)</b>  | <b>Roll (°)</b> | <b>Twist (°)</b> | <b>Shift (Å)</b> | <b>Slide (Å)</b> | <b>Rise (Å)</b> |
|--------------------|------------------|-----------------|------------------|------------------|------------------|-----------------|
| Symbol             | $\tau$           | $\rho$          | $\omega$         | Dx               | Dy               | Dz              |
| S1-dsRNA           | $-0.79 \pm 0.2$  | $7.28 \pm 0.45$ | $30.23 \pm 1.55$ | $-0.67 \pm 0.28$ | $-1.36 \pm 0.26$ | $3.27 \pm 0.43$ |
| S2-dsRNA           | $-0.52 \pm 0.34$ | $8.36 \pm 0.96$ | $29.27 \pm 1.46$ | $1.27 \pm 0.27$  | $-1.21 \pm 0.57$ | $3.30 \pm 0.48$ |
| S3-dsRNA           | $0.13 \pm 0.5$   | $6.24 \pm 0.78$ | $29.52 \pm 1.2$  | $-0.06 \pm 0.01$ | $-1.52 \pm 0.36$ | $3.33 \pm 0.1$  |
| <sup>1</sup> A-DNA | 0.1              | 8.0             | 31.1             | 0.0              | -1.53            | 3.32            |

<sup>1</sup>Standard values obtained for the A-DNA crystal structure. Values presented are averaged over all structural frames in the molecular dynamics trajectories. S1, S2, and S3 represent set 1, 2, and 3, respectively.

**Table S9. Average distance between dimer forming residues of the extracellular domains of TLR3.**

|                    | <b>Residue</b> | <b>Chain</b> | <b>C<math>\alpha</math> distance (<math>\text{\AA}</math>)</b> | <b>Chain</b> | <b>Residue</b> |
|--------------------|----------------|--------------|----------------------------------------------------------------|--------------|----------------|
| <b>S1-TLR3-ECD</b> |                |              |                                                                |              |                |
|                    | D648           | A            | $11.62 \pm 2.92$                                               | B            | T679           |
|                    | E652           | A            | $14.0 \pm 3.15$                                                | B            | H682           |
|                    | T679           | A            | $10.25 \pm 2.19$                                               | B            | D648           |
|                    | H682           | A            | $10.07 \pm 1.34$                                               | B            | E652           |
|                    | P680           | A            | $11.92 \pm 1.51$                                               | B            | P680           |
| <b>S2-TLR3-ECD</b> |                |              |                                                                |              |                |
|                    | D648           | A            | $9.33 \pm 1.46$                                                | B            | T679           |
|                    | E652           | A            | $10.85 \pm 1.67$                                               | B            | H682           |
|                    | T679           | A            | $9.15 \pm 1.26$                                                | B            | D648           |
|                    | H682           | A            | $10.15 \pm 1.53$                                               | B            | E652           |
|                    | P680           | A            | $9.39 \pm 1$                                                   | B            | P680           |
| <b>S3-TLR3-ECD</b> |                |              |                                                                |              |                |
|                    | D648           | A            | $10.57 \pm 0.9$                                                | B            | T679           |
|                    | E652           | A            | $9.41 \pm 0.8$                                                 | B            | H682           |
|                    | T679           | A            | $11.64 \pm 1.15$                                               | B            | D648           |
|                    | H682           | A            | $11.83 \pm 1.57$                                               | B            | E652           |
|                    | P680           | A            | $9.53 \pm 0.8$                                                 | B            | P680           |

*Values are averaged over all structural frames in the molecular dynamics trajectories. S1, S2, and S3 represent set 1, 2, and 3, respectively.*

**Table S10. Selected helical properties of the TM helices in the three TLR3 models.**

|            | Axis length (Å)  |                  | Axis tilt (°)    |                  | Crossing angle (°) | Axis distance at center (Å) |
|------------|------------------|------------------|------------------|------------------|--------------------|-----------------------------|
|            | TM:A             | TM:B             | TM:A             | TM:B             |                    |                             |
| S1-TLR3-TM | $31.56 \pm 2.54$ | $31.25 \pm 3.65$ | $26.41 \pm 4.04$ | $26.69 \pm 4.14$ | $-53.1 \pm 3.16$   | $4.52 \pm 0.98$             |
| S2-TLR3-TM | $31.67 \pm 2.35$ | $31.13 \pm 3.14$ | $20.63 \pm 3.54$ | $21.02 \pm 3.53$ | $-41.66 \pm 2.94$  | $4.43 \pm 0.26$             |
| S3-TLR3-TM | $31.17 \pm 2.86$ | $31.07 \pm 3.23$ | $30.52 \pm 4.51$ | $30.64 \pm 4.24$ | $-61.16 \pm 3.51$  | $3.60 \pm 0.8$              |

*Values are averaged over all structural frames in the molecular dynamics trajectories.*

**Table S11. Comparison of intermolecular hydrogen bonds (H-bonds) formed at the dimerization interface of TIR domains.**

|             | Subunit | Residue | Atom | Occupancy (%) |       |       | Atom | Residue | Subunit |
|-------------|---------|---------|------|---------------|-------|-------|------|---------|---------|
|             |         |         |      | Run 1         | Run 2 | Run 3 |      |         |         |
| S1-TLR3-TIR | A       | R829    | NH1  | 34.23         | 34.32 | 33.22 | OE1  | E794    | B       |
|             | A       | R829    | NH2  | 45.44         | 46.44 | 44.43 | OE1  | E794    | B       |
|             | A       | Q837    | NE2  | 56.45         | 55.43 | 56.45 | OE2  | E801    | B       |
|             | A       | Q842    | NE2  | 58.8          | 54.85 | 55.84 | O    | E752    | B       |
|             | A       | L864    | H    | 57.73         | 56.74 | 53.76 | OE1  | E755    | B       |
|             | A       | C865    | HG   | 45.55         | 63.54 | 45.57 | OE1  | E755    | B       |
|             | A       | C865    | HG   | 52.16         | 48.13 | 54.18 | OE2  | E755    | B       |
|             | A       | H833    | O    | 53.14         | 62.14 | 55.15 | H    | A802    | B       |
|             | A       | Q838    | OE1  | 32.53         | 56.55 | 35.54 | ND2  | N805    | B       |
|             | A       | H862    | O    | 31.72         | 46.73 | 34.73 | HZ2  | K785    | B       |
| S2-TLR3-TIR | A       | K765    | HZ2  | 54.64         | 52.62 | 53.65 | OE1  | E790    | B       |
|             | A       | K828    | HZ1  | 87.31         | 83.22 | 85.25 | O    | L822    | B       |
|             | A       | R829    | NH1  | 86.52         | 84.83 | 86.78 | O    | K823    | B       |
|             | A       | R829    | NH1  | 53.42         | 53.24 | 55.26 | OD1  | D824    | B       |
|             | A       | C827    | HG   | 84.32         | 82.97 | 84.59 | O    | K828    | B       |
|             | A       | G796    | O    | 76.53         | 75.06 | 77.04 | HZ2  | K859    | B       |
|             | A       | V797    | O    | 65.67         | 66.45 | 64.44 | HZ2  | K823    | B       |
|             | A       | E801    | OE1  | 54.36         | 57.44 | 57.43 | ND2  | N861    | B       |
|             | A       | D824    | OD2  | 63.77         | 65.13 | 63.21 | HZ1  | K828    | B       |
| S3-TLR3-TIR | A       | Y764    | HH   | 47.96         | 55.39 | 47.96 | OE2  | E801    | B       |
|             | A       | R829    | NH2  | 66.45         | 35.43 | 56.45 | OE1  | E799    | B       |
|             | A       | E799    | OE1  | 51.74         | 64.74 | 41.74 | HE   | R829    | B       |
|             | A       | C827    | O    | 48.63         | 46.36 | 58.36 | HZ2  | K831    | B       |

*TIR, Toll/interleukin-1 receptor; S1, S2, and S3 represent set 1, 2, and 3, respectively. H-bond occupancy was defined as the fraction of simulation time where an H-bond was formed with cutoff radius of 3.5 Å distance and angle of 30°.*

**Table S12. Intermolecular salt bridges between TIR domain subunits.**

|             | Subunit | Residue | Atom | Distance (Å)    | Atom | Residue | Subunit |
|-------------|---------|---------|------|-----------------|------|---------|---------|
| S1-TLR3-TIR | A       | R829    | NH1  | $3.72 \pm 1.61$ | OE1  | E794    | B       |
|             | A       | R829    | NH1  | $4.25 \pm 1.53$ | OE2  | E794    | B       |
|             | A       | R829    | NH2  | $4.34 \pm 1.59$ | OE1  | E794    | B       |
|             | A       | R829    | NH2  | $4.81 \pm 1.75$ | OE2  | E794    | B       |
|             | A       | H862    | NE2  | $5.08 \pm 2.12$ | OE2  | E778    | B       |
| S2-TLR3-TIR | A       | K765    | NZ   | $5.41 \pm 3.61$ | OE1  | E790    | B       |
|             | A       | K765    | NZ   | $5.41 \pm 3.54$ | OE2  | E790    | B       |
|             | A       | H862    | NE2  | $4.31 \pm 3.66$ | OE1  | E799    | B       |
|             | A       | R829    | NH1  | $5.77 \pm 2.62$ | OD1  | D824    | B       |
|             | A       | R829    | NH2  | $4.11 \pm 2.54$ | OD1  | D824    | B       |
|             | A       | D824    | OD1  | $3.33 \pm 0.91$ | NZ   | K828    | B       |
|             | A       | D824    | OD2  | $4.59 \pm 2.27$ | NZ   | K828    | B       |
| S3-TLR3-TIR | A       | K765    | NZ   | $9.42 \pm 3.37$ | OE2  | E801    | B       |
|             | A       | R829    | NH2  | $3.64 \pm 0.89$ | OE1  | E799    | B       |
|             | A       | E799    | OE1  | $6.24 \pm 1.81$ | NE   | R829    | B       |
|             | A       | E799    | OE1  | $5.66 \pm 2.33$ | NH1  | R829    | B       |

*TIR, Toll/interleukin-1 receptor; S1, S2, and S3 represent set 1, 2, and 3, respectively.*

**Table S13. Buried surface area (BSA) of key residues at the dimer interface of TIR domains.**

| Subunit            | Residue | BSA (Å <sup>2</sup> ) | Subunit | Residue | BSA (Å <sup>2</sup> ) |
|--------------------|---------|-----------------------|---------|---------|-----------------------|
| <b>S1-TLR3-TIR</b> |         |                       |         |         |                       |
| A                  | Q838    | 142.9                 | B       | Q752    | 113.6                 |
| A                  | R868    | 115.6                 | B       | R809    | 84.3                  |
| A                  | V832    | 100.9                 | B       | E794    | 76.0                  |
| A                  | H862    | 95.9                  | B       | Q753    | 73.5                  |
| A                  | L864    | 68.7                  | B       | K785    | 67.7                  |
| A                  | H833    | 60.0                  | B       | N805    | 56.8                  |
| A                  | R829    | 57.9                  | B       | E755    | 56.0                  |
| A                  | V836    | 51.5                  | B       | F793    | 45.9                  |
| A                  | K831    | 42.3                  | B       | D792    | 44.5                  |
| A                  | I840    | 36.9                  | B       | R749    | 33.1                  |
| A                  | A863    | 24.8                  | B       | T751    | 32.4                  |
| A                  | F798    | 24.7                  | B       | S783    | 24.8                  |
| A                  | L800    | 22.1                  | B       | A802    | 19.8                  |
| A                  | K828    | 12.0                  | B       | Y756    | 18.4                  |
| A                  | G869    | 11.8                  | B       | F798    | 17.2                  |
| A                  | A835    | 11.4                  | B       | K808    | 16.7                  |
|                    |         |                       | B       | E801    | 16.1                  |
|                    |         |                       | B       | Q750    | 13.8                  |
|                    |         |                       | B       | R791    | 10.3                  |
| <b>S2-TLR3-TIR</b> |         |                       |         |         |                       |
| A                  | F798    | 126.6                 | B       | H862    | 164.1                 |
| A                  | K828    | 103.5                 | B       | K823    | 82.2                  |
| A                  | H833    | 82.0                  | B       | Y858    | 70.9                  |
| A                  | D824    | 58.7                  | B       | V832    | 61.2                  |
| A                  | Y764    | 52.0                  | B       | K828    | 54.5                  |
| A                  | H862    | 46.8                  | B       | K859    | 49.2                  |
| A                  | V832    | 45.0                  | B       | D824    | 42.1                  |
| A                  | E799    | 38.1                  | B       | Y764    | 34.2                  |
| A                  | L800    | 28.5                  | B       | N861    | 30.3                  |
| A                  | K823    | 22.8                  | B       | L864    | 29.3                  |
| A                  | R829    | 20.0                  | B       | C827    | 20.3                  |
| A                  | E790    | 14.2                  | B       | K765    | 15.8                  |
| A                  | G796    | 11.5                  | B       | H833    | 15.4                  |
| A                  | E789    | 11.3                  | B       | H819    | 13.2                  |
| <b>S3-TLR3-TIR</b> |         |                       |         |         |                       |
| A                  | Y764    | 64.3                  | B       | F798    | 119.3                 |
| A                  | E799    | 60.9                  | B       | E799    | 62.6                  |
| A                  | R829    | 57.6                  | B       | L800    | 54.4                  |
| A                  | K828    | 56.5                  | B       | K828    | 43.3                  |
| A                  | F793    | 50.1                  | B       | R829    | 35.4                  |
| A                  | A795    | 29.1                  | B       | G796    | 29.0                  |
| A                  | P825    | 25.1                  | B       | F793    | 27.2                  |
| A                  | E790    | 24.6                  | B       | E801    | 24.7                  |
| A                  | D824    | 23.8                  | B       | E790    | 19.5                  |
| A                  | F798    | 20.8                  | B       | V797    | 18.5                  |
| A                  | L800    | 18.2                  | B       | Y764    | 10.1                  |
| A                  | G796    | 10.7                  | B       |         |                       |

*Values presented are averaged over all structural frames in the molecular dynamics trajectories of each.*

*S1, S2, and S3 represent set 1, 2, and 3, respectively.*
